# Supplementary material
Source: PubMed Central journal article supplement (PMC3222298)
Supplement: NIHMS337530-supplement-SOM.pdf [file NIHMS337530-supplement-SOM.pdf]

Molecular Cell, Volume 37

## **Supplemental Information**

### **The BCL-2 Family Reunion**

**Jerry E. Chipuk, Tudor Moldoveanu, Fabien Llambi,  
Melissa J. Parsons, and Douglas R. Green**

**Table S1. Signaling to the BCL-2 family**

| Protein                  | Stimulus/Inducer                       | Regulation               | Regulating Factor       | Effect                               | Reference                                         |
|--------------------------|----------------------------------------|--------------------------|-------------------------|--------------------------------------|---------------------------------------------------|
| <b>BH3-only proteins</b> |                                        |                          |                         |                                      |                                                   |
| <b>BAD</b>               | Growth factor                          | Phosphorylation          | Akt                     | Anti-apoptotic                       | del Peso et al., 1997; Datta et al., 1997         |
|                          | Cytokine                               | Phosphorylation          | p70S6k                  | Anti-apoptotic                       | Harada et al., 2001                               |
|                          | Growth factor                          | Phosphorylation          | PKA                     | Anti-apoptotic                       | Datta et al., 2000                                |
|                          | Growth factor                          | Phosphorylation          | p90RSK                  | Anti-apoptotic                       | Tan et al., 1999                                  |
|                          | Growth factor                          | Phosphorylation          | PIM kinases             | Anti-apoptotic                       | Fox et al., 2003; Yan et al., 2003                |
|                          | Cytokine                               | Phosphorylation          | PAK                     | Anti-apoptotic                       | Schürmann et al., 2000; Cotteret et al., 2003     |
|                          | Growth factor withdrawal               | Phosphorylation          | JNK                     | Pro-apoptotic                        | Donovan et al., 2002                              |
|                          | Suppression of neuronal activity       | Phosphorylation          | Cdc2                    | Pro-apoptotic                        | Konishi et al., 2002                              |
|                          | Glucose/Growth factor                  | Phosphorylation          |                         | Glucose/Insulin metabolism           | Danial et al., 2003; Danial et al., 2008          |
|                          | Calcium                                | Dephosphorylation        | Calcineurin             | Pro-apoptotic                        | Wang et al., 1999                                 |
|                          | Cytokine withdrawal                    | Dephosphorylation        | PP2A and PP2C           | Pro-apoptotic                        | Chiang et al., 2001; Klumpp et al., 2003          |
|                          | Cytokine withdrawal                    | Dephosphorylation        | PP1                     | Pro-apoptotic                        | Ayllón et al., 2000                               |
| BAD phosphorylation      | Sequestration                          | 14-3-3                   | Anti-apoptotic          | Zha et al., 1996; Datta et al., 2000 |                                                   |
| <b>BID</b>               | Fas/TNF $\alpha$ /TRAIL                | Cleavage                 | Caspase 8               | Pro-apoptotic                        | Li et al., 1998 Luo et al., 1998                  |
|                          | Heat shock                             | Cleavage                 | Caspase 2               | Pro-apoptotic                        | Bonzon et al., 2006                               |
|                          | Cytotoxic T cell                       | Cleavage                 | Granzyme B              | Pro-apoptotic                        | Sutton et al., 2000; Heibein et al., 2000         |
|                          | Ischemia / cisplatin                   | Cleavage                 | Calpain                 | Pro-apoptotic                        | Chen et al., 2001; Mandic et al., 2002            |
|                          | Lysosome permabilization               | Cleavage                 | Cathepsin               | Pro-apoptotic                        | Stoka et al., 2001; Reiners et al., 2002          |
|                          | BID cleavage                           | N-myristoylation (C-BID) |                         | Pro-apoptotic                        | Zha et al., 2000                                  |
|                          | BID cleavage                           | Ubiquitination (N-BID)   |                         | Pro-apoptotic                        | Tait et al., 2007                                 |
|                          | TNF $\alpha$                           | Phosphorylation          | JNK                     | Pro-apoptotic                        | Deng et al., 2003                                 |
|                          |                                        | Phosphorylation          | Casein kinase           | Anti-apoptotic                       | Desagher et al., 2001; Degli Esposti et al., 2003 |
|                          | DNA damage                             | Phosphorylation          | ATM                     | S phase arrest                       | Zinkel et al., 2005; Kamer et al., 2005           |
| <b>BIM</b>               | Cytokine withdrawal                    | Transcription            | FOXO3a                  | Pro-apoptotic                        | Dijkers et al., 2000; Gilley et al., 2003         |
|                          | ER stress                              | Transcription            | CHOP-C/EBP $\alpha$     | Pro-apoptotic                        | Puthalakath et al., 2007                          |
|                          | Growth factor withdrawal               | Transcription            | c-Jun, FOXO and Myb     | Pro-apoptotic                        | Biswas et al., 2007                               |
|                          | Glucocorticoid                         | Transcription            | Glucocorticoid receptor | Pro-apoptotic                        | Erlacher et al., 2005; Ploner et al., 2008        |
|                          | TGF- $\beta$                           | Transcription            | Smad                    | Pro-apoptotic                        | Ramjaun et al., 2007                              |
|                          |                                        | Transcription            | E2F1                    | Pro-apoptotic                        | Hershko and Ginsberg, 2004                        |
|                          |                                        | mRNA stability           | miR-17-92               | Anti-apoptotic                       | Xiao et al., 2008                                 |
|                          | Growth factor                          | Phosphorylation          | ERK1/2 and RSK1/2       | Anti-apoptotic                       | Ley et al., 2003; Dehan et al., 2009              |
|                          | DNA damage / Trophic factor withdrawal | Phosphorylation          | JNK                     | Pro-apoptotic                        | Lei and Davis, 2003; Putcha et al., 2003          |
|                          | ER stress                              | Dephosphorylation        | PP2A                    | Pro-apoptotic                        | Puthalakath et al., 2007                          |
|                          | Growth factor                          | Ubiquitination           | $\beta$ TrCP            | Anti-apoptotic                       | Akiyama et al., 2003; Dehan et al., 2009          |
|                          |                                        | Sequestration            | DLC1                    | Anti-apoptotic                       | Puthalakath et al., 1999                          |
| <b>BIK</b>               | DNA damage                             | Transcription            | P53                     | Pro-apoptotic                        | Mathai et al., 2002                               |
|                          | TGF- $\beta$                           | Transcription            | Smad                    | Pro-apoptotic                        | Spender et al., 2009                              |
|                          |                                        | Transcription            | E2F1                    | Pro-apoptotic                        | Real et al., 2006                                 |
|                          | Proteasome inhibition                  |                          |                         | Pro-apoptotic                        | Nikrad et al., 2005; Zhu et al., 2005             |
|                          |                                        | Cleavage                 | RHBDD1                  | Anti-apoptotic                       | Wang et al., 2008                                 |
|                          |                                        | Phosphorylation          | Casein kinase           | Pro-apoptotic                        | Verma et al., 2001; Li et al., 2003               |
| <b>BMF</b>               | TGF- $\beta$                           | Transcription            | Smad                    | Pro-apoptotic                        | Ramjaun et al., 2007                              |
|                          |                                        | Sequestration            | DLC2                    | Anti-apoptotic                       | Puthalakath et al., 2001                          |

**Table S1 continued**

|                                      |                                       |                          |                         |                         |                                                             |
|--------------------------------------|---------------------------------------|--------------------------|-------------------------|-------------------------|-------------------------------------------------------------|
| <b>HRK</b>                           | Potassium deprivation                 | Transcription            | c-Jun                   | Pro-apoptotic           | Ma et al., 2007                                             |
|                                      |                                       | Transcription            | E2F1                    | Pro-apoptotic           | Hershko and Ginsberg, 2004                                  |
|                                      | Cytokine                              | Transcription inhibition | DREAM                   | Anti-apoptotic          | Sanz et al., 2001                                           |
| <b>NIX</b>                           | Hypoxia                               | Transcription            | HIF1- $\alpha$          | Pro-apoptotic           | Sowter et al., 2001                                         |
| <b>Noxa</b>                          | DNA damage                            | Transcription            | p53                     | Pro-apoptotic           | Oda et al., 2000                                            |
|                                      | DNA damage                            | Transcription            | p73                     | Pro-apoptotic           | Flinterman et al., 2005                                     |
|                                      | Hypoxia                               | Transcription            | HIF1- $\alpha$          | Pro-apoptotic           | Kim et al., 2004                                            |
|                                      |                                       | Transcription            | E2F1                    | Pro-apoptotic           | Hershko and Ginsberg, 2004                                  |
|                                      | Proteasome inhibition                 | Transcription            | cMyc                    | Anti-apoptotic          | Nikiforov et al., 2007                                      |
|                                      |                                       | Transcription inhibition | $\Delta$ Np63           | Anti-apoptotic          | Rocco et al., 2006                                          |
| <b>PUMA</b>                          |                                       | Transcription inhibition | Bmi1                    | Anti-apoptotic          | Yamashita et al., 2008                                      |
|                                      | DNA damage / Growth factor withdrawal | Transcription            | p53                     | Pro-apoptotic           | Nakano and Vousden, 2001; Yu et al., 2001                   |
|                                      | DNA damage / Growth factor withdrawal | Transcription            | p73                     | Pro-apoptotic           | Melino et al., 2004; Ming et al., 2008                      |
|                                      | Cytokine withdrawal                   | Transcription            | FOXO3a                  | Pro-apoptotic           | You et al., 2006                                            |
|                                      | Glucocorticoid                        | Transcription            | Glucocorticoid receptor | Pro-apoptotic           | Erlacher et al., 2005                                       |
|                                      | ER stress                             | Transcription            | CHOP and p53            | Pro-apoptotic           | Li et al., 2006; Kieran et al., 2007                        |
|                                      |                                       | Transcription            | E2F1                    | Pro-apoptotic           | Hershko and Ginsberg, 2004                                  |
|                                      |                                       | Transcription inhibition | $\Delta$ Np73           | Anti-apoptotic          | Melino et al., 2004                                         |
|                                      |                                       | Transcription inhibition | $\Delta$ Np63           | Anti-apoptotic          | Rocco et al., 2006                                          |
|                                      |                                       | Transcription inhibition | Slug                    | Anti-apoptotic          | Wu et al., 2005                                             |
| <b>Anti-apoptotic BCL-2 proteins</b> |                                       |                          |                         |                         |                                                             |
| <b>A1</b>                            | TNF $\alpha$                          | Cleavage                 | Calpain                 | Pro-apoptotic           | Kucharczak et al., 2005                                     |
| <b>BCL-2</b>                         |                                       | mRNA stability           | miR-15/miR-16           | Pro-apoptotic           | Cimmino et al., 2005                                        |
|                                      |                                       | Phosphorylation          | ERK1/2                  | Anti-apoptotic          | Deng et al., 2000; Deng et al., 2004                        |
|                                      |                                       | Phosphorylation          | JNK                     | Pro-apoptotic           | Yamamoto et al., 1999; Xiao et al., 2004                    |
|                                      | Nutrient deprivation                  | Phosphorylation          | JNK                     | Induction of Autophagy  | Wei et al., 2008                                            |
|                                      |                                       | S-nitrosylation          | nitric oxide            | Anti-apoptotic          | Chanvorachote et al., 2006; Azad et al., 2006               |
| <b>BCL-xL</b>                        | DNA damage                            | Phosphorylation          | JNK                     | Pro-apoptotic           | Kharbanda et al., 2000; Basu and Haldar, 2003               |
|                                      | DNA damage                            | Deamidation              |                         |                         | Deverman et al., 2002; Zhao et al., 2007                    |
| <b>MCL-1</b>                         | Oxydative stress                      | Phosphorylation          | JNK                     | Pro-apoptotic           | Inoshita et al., 2002                                       |
|                                      | Cytokine withdrawal                   | Phosphorylation          | GSK-3                   | Pro-apoptotic           | Maurer et al., 2006                                         |
|                                      |                                       | Phosphorylation          | ERK-1/2                 | Anti-apoptotic          | Domina et al., 2004                                         |
|                                      | DNA damage                            | Ubiquitination           | MULE                    | Pro-apoptotic           | Nijawan et al., 2003; Zhong et al., 2005; Warr et al., 2005 |
|                                      | DNA damage                            | Ubiquitination           | NOXA binding            | Pro-apoptotic           | Willis et al., 2005; Czabotar et al., 2007                  |
|                                      |                                       | Ubiquitination           | $\beta$ -TrCP           | Pro-apoptotic           | Ding et al., 2007                                           |
|                                      | Deubiquitination                      | USP9X                    | Anti-apoptotic          | Schwickart et al., 2010 |                                                             |
| <b>Pro-apoptotic effectors</b>       |                                       |                          |                         |                         |                                                             |
| <b>BAX</b>                           | DNA damage                            | Transcription            | P53                     | Pro-apoptotic           | Miyashita et al., 1995                                      |
|                                      | Growth factor, Nicotine               | Phosphorylation          | Akt                     | Anti-apoptotic          | Gardai et al., 2004; Xin and Deng, 2005                     |
|                                      | Nicotine                              | Phosphorylation          | PKC $\zeta$             | Anti-apoptotic          | Xin et al., 2007                                            |
|                                      | Cytokine                              | Phosphorylation          | ERK1/2                  | Anti-apoptotic          | Shen et al., 2009                                           |
|                                      | DNA damage                            | Phosphorylation          | JNK and p38             | Pro-apoptotic           | Kim et al., 2006                                            |
|                                      | Trophic factor withdrawal             | Phosphorylation          | GSK3- $\beta$           | Pro-apoptotic           | Linseman et al., 2004                                       |
|                                      |                                       | Dephosphorylation        | PP2A                    | Pro-apoptotic           | Xin and Deng, 2006                                          |
|                                      | Cytokine withdrawal                   | Cleavage                 | Calpain                 | Pro-apoptotic           | Toyota et al., 2003; Shen et al., 2009                      |

**Table S2. Mammalian BCL-2 family protein data bank (PDB) structures**

The X-ray and NMR structures are colored in black and red, respectively; species are indicated by h = human, m = mouse or r = rat; h-r denotes human-rat chimeric proteins; \*denotes NMR models derived using docking algorithms.

| Free Protein / Complex   | PDB   | Reference                |
|--------------------------|-------|--------------------------|
| mA1 + mBAK BH3           | 2VOH  | Smits et al., 2008       |
| mA1 + BID BH3            | 2VOI  | Smits et al., 2008       |
| hA1 + hBIM BH3           | 2VM6  | Herman et al., 2008      |
| mA1 + mBMF BH3           | 2VOG  | Smits et al., 2008       |
| mA1 + mPUMA BH3          | 2VOF  | Smits et al., 2008       |
| hBAK (native)            | 2IMT  | Moldoveanu et al., 2006  |
| hBAK (Se-Met derivative) | 2IMS  | Moldoveanu et al., 2006  |
| hBAK                     | 2YV6  | Wang et al., 2009        |
| hBAX                     | 1F16  | Suzuki et al., 2000      |
| hBAX + hBIM SAHB         | 2K7W* | Gavathiotis et al., 2008 |
| hBCL-2 (isoform 1)       | 1G5M  | Petros et al., 2001      |
| hBCL-2 (isoform 2)       | 1GJH  | Petros et al., 2001      |
| hBCL-w                   | 1O0L  | Hinds et al., 2003       |
| hBCL-w                   | 1MK3  | Denisov et al., 2003     |
| hBCL-w + mBID BH3        | 1ZY3* | Denisov et al., 2006     |
| hBCL-xL                  | 1MAZ  | Muchmore et al., 1996    |
| hBCL-xL                  | 1LXL  | Muchmore et al., 1996    |
| rBCL-xL                  | 1AF3  | Aritomi et al., 1997     |
| mBCL-xL                  | 1PQ0  | Liu et al., 2003         |
| hBCL-xL                  | 1R2D  | Manion et al., 2004      |
| hBCL-xL + hBAD BH3       | 1G5J  | Petros et al., 2000      |
| hBCL-xL + hBAK BH3       | 1BXL  | Sattler et al., 1997     |
| hBCL-xL + hBCL-xL        | 2B48  | O'Neill et al., 2006     |
| hBCL-xL + hBeclin BH3    | 2P1L  | Oberstein et al., 2007   |
| mBCL-xL + mBeclin BH3    | 2PON  | Feng et al., 2007        |
| mBCL-xL + mBIM BH3       | 1PQ1  | Liu et al., 2003         |
| hBCL-xL + hBIM BH3       | 3FDL  | Lee et al., 2009         |
| hBID                     | 2BID  | Chou et al., 1999        |
| mBID                     | 1DDB  | McDonnell et al., 1999   |
| mMCL-1                   | 1WSX  | Day et al., 2005         |
| h-rMCL-1 + hBIM BH3      | 2NL9  | Czabotar et al., 2007    |
| mMCL-1 + mNoxa BH3 A     | 2ROD  | Day et al., 2008         |
| mMCL-1 + mNoxa BH3 B     | 2JM6  | Czabotar et al., 2007    |
| h-rMCL-1 + hNoxa BH3 B   | 2NLA  | Czabotar et al., 2007    |
| mMCL-1 + mPUMA BH3       | 2ROC  | Day et al., 2008         |

**Table S3. BCL-2 family mouse model phenotypes**

| Anti-apoptotic BCL-2 proteins |                 |                                                                                                                                                                                                                 |                                                                                                                                                                                                                                                                                                                                           |                                                                    |
|-------------------------------|-----------------|-----------------------------------------------------------------------------------------------------------------------------------------------------------------------------------------------------------------|-------------------------------------------------------------------------------------------------------------------------------------------------------------------------------------------------------------------------------------------------------------------------------------------------------------------------------------------|--------------------------------------------------------------------|
| Gene                          | Mutation        | Phenotype                                                                                                                                                                                                       | Combination Phenotype                                                                                                                                                                                                                                                                                                                     | Reference                                                          |
| <i>a1</i>                     | Knockout        | Neutrophils display enhanced spontaneous apoptosis and lack LPS-induced apoptosis inhibition                                                                                                                    | -NA-                                                                                                                                                                                                                                                                                                                                      | Hamasaki et al., 1998<br>Orlofsky et al., 2002                     |
| <i>bcl-2</i>                  | Knockout        | Increased postnatal mortality, polycystic kidneys, apoptotic involution of thymus and spleen, graying of hair follicles, reduced numbers of neurons, small size                                                 | <b>with <i>bik</i><sup>-/-</sup></b> : No additional phenotype<br><b>with <i>bim</i><sup>-/-</sup></b> : Heterozygous knockout rescues pigment defect; homozygous knockout further rescues kidney phenotype (see below)                                                                                                                   | Coultas et al., 2004<br>Veis et al., 1993<br>Boulliet et al., 2001 |
| <i>bcl-w</i>                  | Knockout        | Male sterile due to spermatogenesis defects                                                                                                                                                                     | -NA-                                                                                                                                                                                                                                                                                                                                      | Print et al., 1998                                                 |
| <i>bcl-x</i>                  | Knockout        | Lethal at embryonic day E13.5 due to massive apoptosis of hematopoietic and neuronal cells                                                                                                                      | -NA-                                                                                                                                                                                                                                                                                                                                      | Motoyama et al., 1995                                              |
| <i>mcl-1</i>                  | Knockout        | Embryonic lethal due to failure of the blastocyst to implant                                                                                                                                                    | -NA-                                                                                                                                                                                                                                                                                                                                      | Rinkenberger et al., 2000                                          |
| Pro-apoptotic effectors       |                 |                                                                                                                                                                                                                 |                                                                                                                                                                                                                                                                                                                                           |                                                                    |
| <i>bak</i>                    | Knockout        | None                                                                                                                                                                                                            | <b>with <i>bax</i><sup>-/-</sup></b> : Pre-/peri-natal lethality; interdigital webbing; behavioral, hematopoietic, homeostatic, immune, nervous system and reproductive defects; cells resistant to apoptosis<br><b>with <i>bim</i><sup>-/-</sup></b> : Increased white blood cells                                                       | Lindsten et al., 2000<br>Hutcheson et al., 2005                    |
| <i>bax</i>                    | Knockout        | B and T cell hyperplasia; abnormal germ cells and gonad morphology; prolonged ovarian lifespan; reduced CNS and PNS cell death                                                                                  | <b>with <i>bak</i><sup>-/-</sup></b> : See above<br><b>with <i>bim</i><sup>-/-</sup></b> : Inter-digital webbing; male infertility; increased white blood cells (see below)                                                                                                                                                               | Hutcheson et al., 2005<br>Knudson et al., 1995<br>Wei et al., 2001 |
| BH3-only proteins             |                 |                                                                                                                                                                                                                 |                                                                                                                                                                                                                                                                                                                                           |                                                                    |
| <i>bad</i>                    | Knockin (3S→3A) | Growth factor-dependent survival is reduced in immune and nervous cells                                                                                                                                         | -NA-                                                                                                                                                                                                                                                                                                                                      | Datta et al., 2002                                                 |
|                               | Knockin (S155A) | Abnormal insulin secretion                                                                                                                                                                                      | -NA-                                                                                                                                                                                                                                                                                                                                      | Danial et al., 2008                                                |
|                               | Knockout        | Animals develop diffuse large B cell lymphoma                                                                                                                                                                   | -NA-                                                                                                                                                                                                                                                                                                                                      | Ranger et al., 2003                                                |
| <i>bid</i>                    | Knockout        | Animals are resistant to anti-Fas ligation                                                                                                                                                                      | <b>with <i>bim</i><sup>-/-</sup></b> : No additional phenotype (see below)                                                                                                                                                                                                                                                                | Yin et al., 1999<br>Willis et al., 2007                            |
| <i>bik</i>                    | Knockout        | None                                                                                                                                                                                                            | <b>with <i>bcl-2</i><sup>-/-</sup></b> : See above<br><b>with <i>bim</i><sup>-/-</sup></b> : Male infertility                                                                                                                                                                                                                             | Coultas et al., 2005                                               |
| <i>bim</i>                    | Knockout        | Accumulation of lymphoid and myeloid cells; development of autoimmune kidney disease; females display imperforated vaginas                                                                                      | <b>with <i>bak</i><sup>-/-</sup></b> : See above<br><b>with <i>bax</i><sup>-/-</sup></b> : See above<br><b>with <i>bid</i><sup>-/-</sup></b> : See above<br><b>with <i>bik</i><sup>-/-</sup></b> : See above<br><b>with <i>bcl-2</i><sup>-/-</sup></b> : See above<br><b>with <i>noxa</i><sup>-/-</sup></b> : Abnormal NK cell morphology | Boulliet et al., 1999<br>Huntington et al., 2007                   |
| <i>bmf</i>                    | Knockout        | Lymphocytes protected from apoptosis induced by glucocorticoids or histone deacetylase inhibitors; mice develop B-cell restricted lymphadenopathy; increased rate of gamma-irradiation-induced thymic lymphomas | -NA-                                                                                                                                                                                                                                                                                                                                      | Labi et al., 2008                                                  |
| <i>bnip3L/nix</i>             | Knockout        | Abnormal morphology, lack of mitochondrial clearance, decreased numbers and increased fragility of reticulocytes and erythrocytes                                                                               | -NA-                                                                                                                                                                                                                                                                                                                                      | Diwan et al., 2007<br>Schweers et al., 2007                        |
| <i>hrk</i>                    | Knockout        | Motorneurons are protected from cell death induced by resection of the hypoglossal nerve; delayed cell death of superior cervical ganglia neurons triggered by nerve growth factor withdrawal                   | -NA-                                                                                                                                                                                                                                                                                                                                      | Imaizumi et al., 2004<br>Coultas et al., 2007                      |
| <i>noxa</i>                   | Knockout        | MEFs and thymocytes display mild resistance to etoposide                                                                                                                                                        | <b>with <i>bim</i><sup>-/-</sup></b> : see above                                                                                                                                                                                                                                                                                          | Villunger et al., 2003                                             |
| <i>puma</i>                   | Knockout        | Lymphocytes protected from apoptosis; thymocytes, neurons and MEFs resistant to DNA-damage induced apoptosis                                                                                                    | -NA-                                                                                                                                                                                                                                                                                                                                      | Jeffers et al., 2003<br>Villunger et al., 2003                     |

**Table S4. Non-BCL-2 family regulators of MOMP**

| <b>Protein</b>                  | <b>Putative BH3?</b> | <b>Binding Partner(s)</b> | <b>Mechanism</b>              | <b>MOMP Description</b>                                                                                                                                                              | <b>Reference</b>                                                                      |
|---------------------------------|----------------------|---------------------------|-------------------------------|--------------------------------------------------------------------------------------------------------------------------------------------------------------------------------------|---------------------------------------------------------------------------------------|
| <b>14-3-3<math>\beta</math></b> | No                   | BAX                       | Inhibitor                     | Blocks BAX translocation and MOMP                                                                                                                                                    | Nomura et al., 2003                                                                   |
| <b>2-5 (A) Synthetase 9-2</b>   | Yes                  | BCL-2, BCL-xL             | De-repressor                  | Over-expression induces apoptosis; mutation of the putative BH3 domain abolishes interaction with BCL-2 and BCL-xL and abolishes apoptosis induction                                 | Ghosh et al., 2001                                                                    |
| <b>Apolipoprotein L6</b>        | Yes                  | Unknown                   | Unknown                       | MOMP and apoptosis induced by overexpression is dependent on the BH3 domain                                                                                                          | Liu et al., 2005                                                                      |
| <b>ASC/TMS1/PYCARD</b>          | No                   | BAX                       | Direct activator              | Knockdown of ASC inhibits BAX translocation                                                                                                                                          | Ohtsuka et al., 2004                                                                  |
| <b>ATG5</b>                     | No                   | BCL-xL                    | De-repressor                  | Calpain-cleaved Atg5 translocates from the cytosol to mitochondria and associates with BCL-xL                                                                                        | Yousefi et al., 2006                                                                  |
| <b>BRCC2</b>                    | Yes                  | Unknown                   | Unknown                       | Over-expression induces apoptosis, which can be blocked by BCL-xL. Deletion of a BH3-like domain abolishes apoptosis-inducing activity                                               | Broustas et al., 2004                                                                 |
| <b>G0S2</b>                     | No                   | BCL-2                     | De-repressor                  | Prevents BCL-2:BAX association                                                                                                                                                       | Welch et al., 2009                                                                    |
| <b>Histone H1.2</b>             | No                   | Unknown                   | Unknown                       | MOMP induction is dependent on BAK                                                                                                                                                   | Konishi et al., 2003                                                                  |
| <b>Humanin</b>                  | No                   | BAX, BID, BIM             | Inhibitor                     | Inhibits BAX, BID and BIM                                                                                                                                                            | Guo et al., 2003<br>Luciano et al., 2005<br>Zhai et al., 2005                         |
| <b>Ku-70</b>                    | No                   | BAX                       | Inhibitor                     | Inhibits BAX in the cytosol                                                                                                                                                          | Amsel et al., 2008                                                                    |
| <b>MAP-1</b>                    | Yes                  | BAX                       | Direct activator              | Interacts with BAX following apoptotic stimuli; siRNA-mediated knockdown reduces apoptosis induced by BAX over-expression and BAX translocation to the mitochondria during apoptosis | Tan et al., 2001<br>Tan et al., 2005                                                  |
| <b>Nucleophosmin</b>            | No                   | BAX                       | Direct activator              | Binds active BAX during apoptosis                                                                                                                                                    | Kerr et al., 2007                                                                     |
| <b>Nur77/TR3</b>                | No                   | BCL-2                     | Direct activator/De-repressor | Induces MOMP, requires BCL-2 over-expression                                                                                                                                         | Lin et al., 2004                                                                      |
| <b>p53</b>                      | No                   | BAK, BAX, BCL-xL          | Direct activator/De-repressor | Induces MOMP via BAK/BAX                                                                                                                                                             | Mihara et al., 2003<br>Chipuk et al., 2004<br>Leu et al., 2004<br>Chipuk et al., 2005 |
| <b>RAD9</b>                     | Yes                  | BCL-2, BCL-xL             | De-repressor                  | Deletion of BH3 domain abolishes ability to induce apoptosis and interact with BCL-2 and BCL-xL                                                                                      | Komatsu et al., 2000                                                                  |
| <b>SPIKE/CMP5</b>               | Yes                  | Bap31                     | De-repressor                  | Prevents formation of a complex between Bap31 and BCL-xL                                                                                                                             | Mund et al., 2003                                                                     |
| <b>Tissue Transglutaminase</b>  | Yes                  | BAX                       | Direct activator              | Sensitizes cells to staurosporine in a BH3-dependent manner; co-IPs BAX from purified mitochondria                                                                                   | Rodolfo et al., 2004                                                                  |
| <b>VDAC2</b>                    | No                   | BAK                       | Inhibitor                     | Maintains BAK in a monomeric, inactive conformation                                                                                                                                  | Cheng et al., 2003                                                                    |

## SUPPLEMENTAL REFERENCES

- Akiyama, T., Bouillet, P., Miyazaki, T., Kadono, Y., Chikuda, H., Chung, U.-I., Fukuda, A., Hikita, A., Seto, H., Okada, T., *et al.* (2003). Regulation of osteoclast apoptosis by ubiquitylation of proapoptotic BH3-only Bcl-2 family member Bim. *EMBO J* 22, 6653-6664
- Amsel, A.D., Rathaus, M., Kronman, N., and Cohen, H.Y. (2008). Regulation of the proapoptotic factor Bax by Ku70-dependent deubiquitylation. *Proc Natl Acad Sci U S A* 105, 5117-5122
- Aritomi, M., Kunishima, N., Inohara, N., Ishibashi, Y., Ohta, S., and Morikawa, K. (1997). Crystal structure of rat Bcl-xL. Implications for the function of the Bcl-2 protein family. *J Biol Chem* 272, 27886-27892
- Ayllón, V., Martínez-A, C., García, A., Cayla, X., and Rebollo, A. (2000). Protein phosphatase 1alpha is a Ras-activated Bad phosphatase that regulates interleukin-2 deprivation-induced apoptosis. *EMBO J* 19, 2237-2246
- Azad, N., Vallyathan, V., Wang, L., Tantishaiyakul, V., Stehlik, C., Leonard, S.S., and Rojanasakul, Y. (2006). S-nitrosylation of Bcl-2 inhibits its ubiquitin-proteasomal degradation. A novel antiapoptotic mechanism that suppresses apoptosis. *J Biol Chem* 281, 34124-34134
- Basu, A., and Haldar, S. (2003). Identification of a novel Bcl-xL phosphorylation site regulating the sensitivity of taxol- or 2-methoxyestradiol-induced apoptosis. *FEBS Lett* 538, 41-47
- Biswas, S.C., Shi, Y., Sproul, A., and Greene, L.A. (2007). Pro-apoptotic Bim induction in response to nerve growth factor deprivation requires simultaneous activation of three different death signaling pathways. *J Biol Chem* 282, 29368-29374
- Bonzon, C., Bouchier-Hayes, L., Pagliari, L.J., Green, D.R., and Newmeyer, D.D. (2006). Caspase-2-induced apoptosis requires bid cleavage: a physiological role for bid in heat shock-induced death. *Mol Biol Cell* 17, 2150-2157
- Bouillet, P., Cory, S., Zhang, L.C., Strasser, A., and Adams, J.M. (2001). Degenerative disorders caused by Bcl-2 deficiency prevented by loss of its BH3-only antagonist Bim. *Dev Cell* 1, 645-653
- Bouillet, P., Metcalf, D., Huang, D.C., Tarlinton, D.M., Kay, T.W., Kontgen, F., Adams, J.M., and Strasser, A. (1999). Proapoptotic Bcl-2 relative Bim required for certain apoptotic responses, leukocyte homeostasis, and to preclude autoimmunity. *Science* 286, 1735-1738
- Broustas, C.G., Gokhale, P.C., Rahman, A., Dritschilo, A., Ahmad, I., and Kasid, U. (2004). BRCC2, a novel BH3-like domain-containing protein, induces apoptosis in a caspase-dependent manner. *J Biol Chem* 279, 26780-26788
- Chanvorachote, P., Nimmannit, U., Stehlik, C., Wang, L., Jiang, B.-H., Ongpipatanakul, B., and Rojanasakul, Y. (2006). Nitric oxide regulates cell sensitivity to cisplatin-induced apoptosis through S-nitrosylation and inhibition of Bcl-2 ubiquitination. *Cancer Res* 66, 6353-6360
- Chen, M., He, H., Zhan, S., Krajewski, S., Reed, J.C., and Gottlieb, R.A. (2001). Bid is cleaved by calpain to an active fragment in vitro and during myocardial ischemia/reperfusion. *J Biol Chem* 276, 30724-30728
- Cheng, E.H., Sheiko, T.V., Fisher, J.K., Craigen, W.J., and Korsmeyer, S.J. (2003). VDAC2 inhibits BAK activation and mitochondrial apoptosis. *Science* 301, 513-517
- Chiang, C.W., Harris, G., Ellig, C., Masters, S.C., Subramanian, R., Shenolikar, S., Wadzinski, B.E., and Yang, E. (2001). Protein phosphatase 2A activates the proapoptotic function of BAD in interleukin-3-dependent lymphoid cells by a mechanism requiring 14-3-3 dissociation. *Blood* 97, 1289-1297

Chipuk, J.E., Bouchier-Hayes, L., Kuwana, T., Newmeyer, D.D., and Green, D.R. (2005). PUMA couples the nuclear and cytoplasmic proapoptotic function of p53. *Science* 309, 1732-1735

Chipuk, J.E., Kuwana, T., Bouchier-Hayes, L., Droin, N.M., Newmeyer, D.D., Schuler, M., and Green, D.R. (2004). Direct activation of Bax by p53 mediates mitochondrial membrane permeabilization and apoptosis. *Science* 303, 1010-1014

Chou, J.J., Li, H., Salvesen, G.S., Yuan, J., and Wagner, G. (1999). Solution structure of BID, an intracellular amplifier of apoptotic signaling. *Cell* 96, 615-624

Cimmino, A., Calin, G.A., Fabbri, M., Iorio, M.V., Ferracin, M., Shimizu, M., Wojcik, S.E., Aqeilan, R.I., Zupo, S., Dono, M., *et al.* (2005). miR-15 and miR-16 induce apoptosis by targeting BCL2. *Proc Natl Acad Sci USA* 102, 13944-13949

Cotteret, S., Jaffer, Z.M., Beeser, A., and Chernoff, J. (2003). p21-Activated kinase 5 (Pak5) localizes to mitochondria and inhibits apoptosis by phosphorylating BAD. *Mol Cell Biol* 23, 5526-5539

Coultas, L., Bouillet, P., Loveland, K.L., Meachem, S., Perlman, H., Adams, J.M., and Strasser, A. (2005). Concomitant loss of proapoptotic BH3-only Bcl-2 antagonists Bik and Bim arrests spermatogenesis. *Embo J* 24, 3963-3973

Coultas, L., Bouillet, P., Stanley, E.G., Brodnicki, T.C., Adams, J.M., and Strasser, A. (2004). Proapoptotic BH3-only Bcl-2 family member Bik/Blk/Nbk is expressed in hemopoietic and endothelial cells but is redundant for their programmed death. *Mol Cell Biol* 24, 1570-1581

Coultas, L., Terzano, S., Thomas, T., Voss, A., Reid, K., Stanley, E.G., Scott, C.L., Bouillet, P., Bartlett, P., Ham, J., *et al.* (2007). Hrk/DP5 contributes to the apoptosis of select neuronal populations but is dispensable for haematopoietic cell apoptosis. *J Cell Sci* 120, 2044-2052

Czabotar, P.E., Lee, E.F., van Delft, M.F., Day, C.L., Smith, B.J., Huang, D.C.S., Fairlie, W.D., Hinds, M.G., and Colman, P.M. (2007). Structural insights into the degradation of Mcl-1 induced by BH3 domains. *Proc Natl Acad Sci USA* 104, 6217-6222

Danial, N.N., Gramm, C.F., Scorrano, L., Zhang, C., Krauss, S., Ranger, A.M., Datta, S., Greenberg, M., Licklider, L.J., Lowell, B., *et al.* (2003). BAD and glucokinase reside in a mitochondrial complex that integrates glycolysis and apoptosis. *Nature* 424, 952-956

Danial, N.N., Walensky, L.D., Zhang, C.Y., Choi, C.S., Fisher, J.K., Molina, A.J., Datta, S.R., Pitter, K.L., Bird, G.H., Wikstrom, J.D., *et al.* (2008). Dual role of proapoptotic BAD in insulin secretion and beta cell survival. *Nat Med* 14, 144-153

Datta, S.R., Dudek, H., Tao, X., Masters, S., Fu, H., Gotoh, Y., and Greenberg, M.E. (1997). Akt phosphorylation of BAD couples survival signals to the cell-intrinsic death machinery. *Cell* 91, 231-241

Datta, S.R., Katsov, A., Hu, L., Petros, A., Fesik, S.W., Yaffe, M.B., and Greenberg, M.E. (2000). 14-3-3 proteins and survival kinases cooperate to inactivate BAD by BH3 domain phosphorylation. *Molecular Cell* 6, 41-51

Datta, S.R., Ranger, A.M., Lin, M.Z., Sturgill, J.F., Ma, Y.C., Cowan, C.W., Dikkes, P., Korsmeyer, S.J., and Greenberg, M.E. (2002). Survival factor-mediated BAD phosphorylation raises the mitochondrial threshold for apoptosis. *Dev Cell* 3, 631-643

Day, C.L., Chen, L., Richardson, S.J., Harrison, P.J., Huang, D.C., and Hinds, M.G. (2005). Solution structure of prosurvival Mcl-1 and characterization of its binding by proapoptotic BH3-only ligands. *J Biol Chem* 280, 4738-4744



Day, C.L., Smits, C., Fan, F.C., Lee, E.F., Fairlie, W.D., and Hinds, M.G. (2008). Structure of the BH3 domains from the p53-inducible BH3-only proteins Noxa and Puma in complex with Mcl-1. *J Mol Biol* 380, 958-971

Degli Esposti, M., Ferry, G., Masdehors, P., Boutin, J.A., Hickman, J.A., and Dive, C. (2003). Post-translational modification of Bid has differential effects on its susceptibility to cleavage by caspase 8 or caspase 3. *J Biol Chem* 278, 15749-15757

Dehan, E., Bassermann, F., Guardavaccaro, D., Vasiliver-Shamis, G., Cohen, M., Lowes, K.N., Dustin, M., Huang, D.C., Taunton, J., and Pagano, M. (2009). betaTrCP- and Rsk1/2-mediated degradation of BimEL inhibits apoptosis. *Molecular Cell* 33, 109-116

del Peso, L., González-García, M., Page, C., Herrera, R., and Nuñez, G. (1997). Interleukin-3-induced phosphorylation of BAD through the protein kinase Akt. *Science* 278, 687-689

Deng, X., Gao, F., Flagg, T., and May, W.S. (2004). Mono- and multisite phosphorylation enhances Bcl2's antiapoptotic function and inhibition of cell cycle entry functions. *Proc Natl Acad Sci USA* 101, 153-158

Deng, X., Ruvolo, P., Carr, B., and May, W.S. (2000). Survival function of ERK1/2 as IL-3-activated, staurosporine-resistant Bcl2 kinases. *Proc Natl Acad Sci USA* 97, 1578-1583

Deng, Y., Ren, X., Yang, L., Lin, Y., and Wu, X. (2003). A JNK-dependent pathway is required for TNFalpha-induced apoptosis. *Cell* 115, 61-70

Denisov, A.Y., Chen, G., Sprules, T., Moldoveanu, T., Beauparlant, P., and Gehring, K. (2006). Structural model of the BCL-w-BID peptide complex and its interactions with phospholipid micelles. *Biochemistry* 45, 2250-2256

Denisov, A.Y., Madiraju, M.S., Chen, G., Khadir, A., Beauparlant, P., Attardo, G., Shore, G.C., and Gehring, K. (2003). Solution structure of human BCL-w: modulation of ligand binding by the C-terminal helix. *J Biol Chem* 278, 21124-21128

Desagher, S., Osen-Sand, A., Montessuit, S., Magnenat, E., Vilbois, F., Hochmann, A., Journot, L., Antonsson, B., and Martinou, J.C. (2001). Phosphorylation of bid by casein kinases I and II regulates its cleavage by caspase 8. *Molecular Cell* 8, 601-611

Deverman, B.E., Cook, B.L., Manson, S.R., Niederhoff, R.A., Langer, E.M., Rosová, I., Kulans, L.A., Fu, X., Weinberg, J.S., Heinecke, J.W., *et al.* (2002). Bcl-xL deamidation is a critical switch in the regulation of the response to DNA damage. *Cell* 111, 51-62

Dijkers, P.F., Medema, R.H., Lammers, J.W., Koenderman, L., and Coffey, P.J. (2000). Expression of the pro-apoptotic Bcl-2 family member Bim is regulated by the forkhead transcription factor FKHR-L1. *Curr Biol* 10, 1201-1204

Ding, Q., He, X., Hsu, J.-M., Xia, W., Chen, C.-T., Li, L.-Y., Lee, D.-F., Liu, J.-C., Zhong, Q., Wang, X., and Hung, M.-C. (2007). Degradation of Mcl-1 by beta-TrCP mediates glycogen synthase kinase 3-induced tumor suppression and chemosensitization. *Mol Cell Biol* 27, 4006-4017

Diwan, A., Koesters, A.G., Odley, A.M., Pushkaran, S., Baines, C.P., Spike, B.T., Daria, D., Jegga, A.G., Geiger, H., Aronow, B.J., *et al.* (2007). Unrestrained erythroblast development in Nix<sup>-/-</sup> mice reveals a mechanism for apoptotic modulation of erythropoiesis. *Proc Natl Acad Sci U S A* 104, 6794-6799

Domina, A.M., Vrana, J.A., Gregory, M.A., Hann, S.R., and Craig, R.W. (2004). MCL1 is phosphorylated in the PEST region and stabilized upon ERK activation in viable cells, and at additional sites with cytotoxic okadaic acid or taxol. *Oncogene* 23, 5301-5315

- Donovan, N., Becker, E.B.E., Konishi, Y., and Bonni, A. (2002). JNK phosphorylation and activation of BAD couples the stress-activated signaling pathway to the cell death machinery. *J Biol Chem* 277, 40944-40949
- Erlacher, M., Michalak, E.M., Kelly, P.N., Labi, V., Niederegger, H., Coultas, L., Adams, J.M., Strasser, A., and Villunger, A. (2005). BH3-only proteins Puma and Bim are rate-limiting for gamma-radiation- and glucocorticoid-induced apoptosis of lymphoid cells in vivo. *Blood* 106, 4131-4138
- Feng, W., Huang, S., Wu, H., and Zhang, M. (2007). Molecular basis of Bcl-xL's target recognition versatility revealed by the structure of Bcl-xL in complex with the BH3 domain of Beclin-1. *J Mol Biol* 372, 223-235
- Flinterman, M., Guelen, L., Ezzati-Nik, S., Killick, R., Melino, G., Tominaga, K., Mymryk, J.S., Gäken, J., and Tavassoli, M. (2005). E1A activates transcription of p73 and Noxa to induce apoptosis. *J Biol Chem* 280, 5945-5959
- Fox, C.J., Hammerman, P.S., Cinalli, R.M., Master, S.R., Chodosh, L.A., and Thompson, C.B. (2003). The serine/threonine kinase Pim-2 is a transcriptionally regulated apoptotic inhibitor. *Genes Dev* 17, 1841-1854
- Gardai, S.J., Hildeman, D.A., Frankel, S.K., Whitlock, B.B., Frasch, S.C., Borregaard, N., Marrack, P., Bratton, D.L., and Henson, P.M. (2004). Phosphorylation of Bax Ser184 by Akt regulates its activity and apoptosis in neutrophils. *J Biol Chem* 279, 21085-21095
- Gavathiotis, E., Suzuki, M., Davis, M.L., Pitter, K., Bird, G.H., Katz, S.G., Tu, H.C., Kim, H., Cheng, E.H., Tjandra, N., and Walensky, L.D. (2008). BAX activation is initiated at a novel interaction site. *Nature* 455, 1076-1081
- Ghosh, A., Sarkar, S.N., Rowe, T.M., and Sen, G.C. (2001). A specific isozyme of 2'-5' oligoadenylate synthetase is a dual function proapoptotic protein of the Bcl-2 family. *J Biol Chem* 276, 25447-25455
- Gilley, J., Coffey, P.J., and Ham, J. (2003). FOXO transcription factors directly activate bim gene expression and promote apoptosis in sympathetic neurons. *J Cell Biol* 162, 613-622
- Guo, B., Zhai, D., Cabezas, E., Welsh, K., Nouraini, S., Satterthwait, A.C., and Reed, J.C. (2003). Humanin peptide suppresses apoptosis by interfering with Bax activation. *Nature* 423, 456-461
- Hamasaki, A., Sendo, F., Nakayama, K., Ishida, N., Negishi, I., and Hatakeyama, S. (1998). Accelerated neutrophil apoptosis in mice lacking A1-a, a subtype of the bcl-2-related A1 gene. *J Exp Med* 188, 1985-1992
- Harada, H., Andersen, J.S., Mann, M., Terada, N., and Korsmeyer, S.J. (2001). p70S6 kinase signals cell survival as well as growth, inactivating the pro-apoptotic molecule BAD. *Proc Natl Acad Sci USA* 98, 9666-9670
- Heibein, J.A., Goping, I.S., Barry, M., Pinkoski, M.J., Shore, G., Green, D.R., and Bleackley, R.C. (2000). Granzyme B-mediated cytochrome c release is regulated by the Bcl-2 family members bid and Bax. *J Exp Med* 192, 1391-1402
- Herman, M.D., Nyman, T., Welin, M., Lehtio, L., Flodin, S., Tresaugues, L., Kotenyova, T., Flores, A., and Nordlund, P. (2008). Completing the family portrait of the anti-apoptotic Bcl-2 proteins: crystal structure of human Bfl-1 in complex with Bim. *FEBS Lett* 582, 3590-3594
- Hershko, T., and Ginsberg, D. (2004). Up-regulation of Bcl-2 homology 3 (BH3)-only proteins by E2F1 mediates apoptosis. *J Biol Chem* 279, 8627-8634

Hinds, M.G., Lackmann, M., Skea, G.L., Harrison, P.J., Huang, D.C., and Day, C.L. (2003). The structure of Bcl-w reveals a role for the C-terminal residues in modulating biological activity. *Embo J* 22, 1497-1507

Huntington, N.D., Puthalakath, H., Gunn, P., Naik, E., Michalak, E.M., Smyth, M.J., Tabarias, H., Degli-Esposti, M.A., Dewson, G., Willis, S.N., *et al.* (2007). Interleukin 15-mediated survival of natural killer cells is determined by interactions among Bim, Noxa and Mcl-1. *Nat Immunol* 8, 856-863

Hutcheson, J., Scatizzi, J.C., Bickel, E., Brown, N.J., Bouillet, P., Strasser, A., and Perlman, H. (2005). Combined loss of proapoptotic genes Bak or Bax with Bim synergizes to cause defects in hematopoiesis and in thymocyte apoptosis. *J Exp Med* 201, 1949-1960

Imaizumi, K., Benito, A., Kiryu-Seo, S., Gonzalez, V., Inohara, N., Lieberman, A.P., Kiyama, H., and Nunez, G. (2004). Critical role for DP5/Harakiri, a Bcl-2 homology domain 3-only Bcl-2 family member, in axotomy-induced neuronal cell death. *J Neurosci* 24, 3721-3725

Inoshita, S., Takeda, K., Hatai, T., Terada, Y., Sano, M., Hata, J., Umezawa, A., and Ichijo, H. (2002). Phosphorylation and inactivation of myeloid cell leukemia 1 by JNK in response to oxidative stress. *J Biol Chem* 277, 43730-43734

Jeffers, J.R., Parganas, E., Lee, Y., Yang, C., Wang, J., Brennan, J., MacLean, K.H., Han, J., Chittenden, T., Ihle, J.N., *et al.* (2003). Puma is an essential mediator of p53-dependent and -independent apoptotic pathways. *Cancer Cell* 4, 321-328

Kamer, I., Sarig, R., Zaltsman, Y., Niv, H., Oberkovitz, G., Regev, L., Haimovich, G., Lerenthal, Y., Marcellus, R.C., and Gross, A. (2005). Proapoptotic BID is an ATM effector in the DNA-damage response. *Cell* 122, 593-603

Kerr, L.E., Birse-Archbold, J.L., Short, D.M., McGregor, A.L., Heron, I., Macdonald, D.C., Thompson, J., Carlson, G.J., Kelly, J.S., McCulloch, J., and Sharkey, J. (2007). Nucleophosmin is a novel Bax chaperone that regulates apoptotic cell death. *Oncogene* 26, 2554-2562

Kharbanda, S., Saxena, S., Yoshida, K., Pandey, P., Kaneki, M., Wang, Q., Cheng, K., Chen, Y.N., Campbell, A., Sudha, T., *et al.* (2000). Translocation of SAPK/JNK to mitochondria and interaction with Bcl-x(L) in response to DNA damage. *J Biol Chem* 275, 322-327

Kieran, D., Woods, I., Villunger, A., Strasser, A., and Prehn, J.H.M. (2007). Deletion of the BH3-only protein puma protects motoneurons from ER stress-induced apoptosis and delays motoneuron loss in ALS mice. *Proc Natl Acad Sci USA* 104, 20606-20611

Kim, B.-J., Ryu, S.-W., and Song, B.-J. (2006). JNK- and p38 kinase-mediated phosphorylation of Bax leads to its activation and mitochondrial translocation and to apoptosis of human hepatoma HepG2 cells. *J Biol Chem* 281, 21256-21265

Kim, J.-Y., Ahn, H.-J., Ryu, J.-H., Suk, K., and Park, J.-H. (2004). BH3-only protein Noxa is a mediator of hypoxic cell death induced by hypoxia-inducible factor 1alpha. *J Exp Med* 199, 113-124

Klumpp, S., Selke, D., and Krieglstein, J. (2003). Protein phosphatase type 2C dephosphorylates BAD. *Neurochem Int* 42, 555-560

Knudson, C.M., Tung, K.S., Tourtellotte, W.G., Brown, G.A., and Korsmeyer, S.J. (1995). Bax-deficient mice with lymphoid hyperplasia and male germ cell death. *Science* 270, 96-99

Komatsu, K., Miyashita, T., Hang, H., Hopkins, K.M., Zheng, W., Cuddeback, S., Yamada, M., Lieberman, H.B., and Wang, H.G. (2000). Human homologue of *S. pombe* Rad9 interacts with BCL-2/BCL-xL and promotes apoptosis. *Nat Cell Biol* 2, 1-6

- Konishi, A., Shimizu, S., Hirota, J., Takao, T., Fan, Y., Matsuoka, Y., Zhang, L., Yoneda, Y., Fujii, Y., Skoultchi, A.I., and Tsujimoto, Y. (2003). Involvement of histone H1.2 in apoptosis induced by DNA double-strand breaks. *Cell* 114, 673-688
- Konishi, Y., Lehtinen, M., Donovan, N., and Bonni, A. (2002). Cdc2 phosphorylation of BAD links the cell cycle to the cell death machinery. *Molecular Cell* 9, 1005-1016
- Kucharczak, J.F., Simmons, M.J., Duckett, C.S., and Gélinas, C. (2005). Constitutive proteasome-mediated turnover of Bfl-1/A1 and its processing in response to TNF receptor activation in FL5.12 pro-B cells convert it into a prodeath factor. *Cell Death Differ* 12, 1225-1239
- Labi, V., Erlacher, M., Kiessling, S., Manzl, C., Frenzel, A., O'Reilly, L., Strasser, A., and Villunger, A. (2008). Loss of the BH3-only protein Bmf impairs B cell homeostasis and accelerates gamma irradiation-induced thymic lymphoma development. *J Exp Med* 205, 641-655
- Lee, E.F., Sadowsky, J.D., Smith, B.J., Czabotar, P.E., Peterson-Kaufman, K.J., Colman, P.M., Gellman, S.H., and Fairlie, W.D. (2009). High-resolution structural characterization of a helical alpha/beta-peptide foldamer bound to the anti-apoptotic protein Bcl-xL. *Angew Chem Int Ed Engl* 48, 4318-4322
- Lei, K., and Davis, R.J. (2003). JNK phosphorylation of Bim-related members of the Bcl2 family induces Bax-dependent apoptosis. *Proc Natl Acad Sci USA* 100, 2432-2437
- Leu, J.I., Dumont, P., Hafey, M., Murphy, M.E., and George, D.L. (2004). Mitochondrial p53 activates Bak and causes disruption of a Bak-Mcl1 complex. *Nat Cell Biol* 6, 443-450
- Ley, R., Balmano, K., Hadfield, K., Weston, C., and Cook, S.J. (2003). Activation of the ERK1/2 signaling pathway promotes phosphorylation and proteasome-dependent degradation of the BH3-only protein, Bim. *J Biol Chem* 278, 18811-18816
- Li, H., Zhu, H., Xu, C.J., and Yuan, J. (1998). Cleavage of BID by caspase 8 mediates the mitochondrial damage in the Fas pathway of apoptosis. *Cell* 94, 491-501
- Li, J., Lee, B., and Lee, A.S. (2006). Endoplasmic reticulum stress-induced apoptosis: multiple pathways and activation of p53-up-regulated modulator of apoptosis (PUMA) and NOXA by p53. *J Biol Chem* 281, 7260-7270
- Li, Y.M., Wen, Y., Zhou, B.P., Kuo, H.-P., Ding, Q., and Hung, M.-C. (2003). Enhancement of Bik antitumor effect by Bik mutants. *Cancer Res* 63, 7630-7633
- Lin, B., Kolluri, S.K., Lin, F., Liu, W., Han, Y.H., Cao, X., Dawson, M.I., Reed, J.C., and Zhang, X.K. (2004). Conversion of Bcl-2 from protector to killer by interaction with nuclear orphan receptor Nur77/TR3. *Cell* 116, 527-540
- Lindsten, T., Ross, A.J., King, A., Zong, W.X., Rathmell, J.C., Shiels, H.A., Ulrich, E., Waymire, K.G., Mahar, P., Frauwirth, K., *et al.* (2000). The combined functions of proapoptotic Bcl-2 family members bak and bax are essential for normal development of multiple tissues. *Mol Cell* 6, 1389-1399
- Linseman, D.A., Butts, B.D., Precht, T.A., Phelps, R.A., Le, S.S., Laessig, T.A., Bouchard, R.J., Florez-McClure, M.L., and Heidenreich, K.A. (2004). Glycogen synthase kinase-3beta phosphorylates Bax and promotes its mitochondrial localization during neuronal apoptosis. *J Neurosci* 24, 9993-10002
- Liu, X., Dai, S., Zhu, Y., Marrack, P., and Kappler, J.W. (2003). The structure of a Bcl-xL/Bim fragment complex: implications for Bim function. *Immunity* 19, 341-352

- Liu, Z., Lu, H., Jiang, Z., Pastuszyn, A., and Hu, C.A. (2005). Apolipoprotein I6, a novel proapoptotic Bcl-2 homology 3-only protein, induces mitochondria-mediated apoptosis in cancer cells. *Mol Cancer Res* 3, 21-31
- Luciano, F., Zhai, D., Zhu, X., Bailly-Maitre, B., Ricci, J.E., Satterthwait, A.C., and Reed, J.C. (2005). Cytoprotective peptide humanin binds and inhibits proapoptotic Bcl-2/Bax family protein BimEL. *J Biol Chem* 280, 15825-15835
- Luo, X., Budihardjo, I., Zou, H., Slaughter, C., and Wang, X. (1998). Bid, a Bcl2 interacting protein, mediates cytochrome c release from mitochondria in response to activation of cell surface death receptors. *Cell* 94, 481-490
- Ma, C., Ying, C., Yuan, Z., Song, B., Li, D., Liu, Y., Lai, B., Li, W., Chen, R., Ching, Y.-P., and Li, M. (2007). dp5/HRK is a c-Jun target gene and required for apoptosis induced by potassium deprivation in cerebellar granule neurons. *J Biol Chem* 282, 30901-30909
- Mandic, A., Viktorsson, K., Strandberg, L., Heiden, T., Hansson, J., Linder, S., and Shoshan, M.C. (2002). Calpain-mediated Bid cleavage and calpain-independent Bak modulation: two separate pathways in cisplatin-induced apoptosis. *Mol Cell Biol* 22, 3003-3013
- Manion, M.K., O'Neill, J.W., Giedt, C.D., Kim, K.M., Zhang, K.Y., and Hockenbery, D.M. (2004). Bcl-XL mutations suppress cellular sensitivity to antimycin A. *J Biol Chem* 279, 2159-2165
- Mathai, J.P., Germain, M., Marcellus, R.C., and Shore, G.C. (2002). Induction and endoplasmic reticulum location of BIK/NBK in response to apoptotic signaling by E1A and p53. *Oncogene* 21, 2534-2544
- Maurer, U., Charvet, C., Wagman, A.S., Dejardin, E., and Green, D.R. (2006). Glycogen synthase kinase-3 regulates mitochondrial outer membrane permeabilization and apoptosis by destabilization of MCL-1. *Molecular Cell* 21, 749-760
- McDonnell, J.M., Fushman, D., Milliman, C.L., Korsmeyer, S.J., and Cowburn, D. (1999). Solution structure of the proapoptotic molecule BID: a structural basis for apoptotic agonists and antagonists. *Cell* 96, 625-634
- Melino, G., Bernassola, F., Ranalli, M., Yee, K., Zong, W.X., Corazzari, M., Knight, R.A., Green, D.R., Thompson, C., and Vousden, K.H. (2004). p73 Induces apoptosis via PUMA transactivation and Bax mitochondrial translocation. *J Biol Chem* 279, 8076-8083
- Mihara, M., Erster, S., Zaika, A., Petrenko, O., Chittenden, T., Pancoska, P., and Moll, U.M. (2003). p53 has a direct apoptogenic role at the mitochondria. *Mol Cell* 11, 577-590
- Ming, L., Sakaida, T., Yue, W., Jha, A., Zhang, L., and Yu, J. (2008). Sp1 and p73 activate PUMA following serum starvation. *Carcinogenesis* 29, 1878-1884
- Miyashita, T., and Reed, J.C. (1995). Tumor suppressor p53 is a direct transcriptional activator of the human bax gene. *Cell* 80, 293-299
- Moldoveanu, T., Liu, Q., Tocilj, A., Watson, M., Shore, G., and Gehring, K. (2006). The X-ray structure of a BAK homodimer reveals an inhibitory zinc binding site. *Mol Cell* 24, 677-688
- Motoyama, N., Wang, F., Roth, K.A., Sawa, H., Nakayama, K., Negishi, I., Senju, S., Zhang, Q., Fujii, S., and et al. (1995). Massive cell death of immature hematopoietic cells and neurons in Bcl-x-deficient mice. *Science* 267, 1506-1510

- Muchmore, S.W., Sattler, M., Liang, H., Meadows, R.P., Harlan, J.E., Yoon, H.S., Nettesheim, D., Chang, B.S., Thompson, C.B., Wong, S.L., *et al.* (1996). X-ray and NMR structure of human Bcl-xL, an inhibitor of programmed cell death. *Nature* 381, 335-341
- Mund, T., Gewies, A., Schoenfeld, N., Bauer, M.K., and Grimm, S. (2003). Spike, a novel BH3-only protein, regulates apoptosis at the endoplasmic reticulum. *Faseb J* 17, 696-698
- Nakano, K., and Vousden, K.H. (2001). PUMA, a novel proapoptotic gene, is induced by p53. *Molecular Cell* 7, 683-694
- Nijhawan, D., Fang, M., Traer, E., Zhong, Q., Gao, W., Du, F., and Wang, X. (2003). Elimination of Mcl-1 is required for the initiation of apoptosis following ultraviolet irradiation. *Genes Dev* 17, 1475-1486
- Nikiforov, M.A., Riblett, M., Tang, W.-H., Gratchouck, V., Zhuang, D., Fernandez, Y., Verhaegen, M., Varambally, S., Chinnaiyan, A.M., Jakubowiak, A.J., and Soengas, M.S. (2007). Tumor cell-selective regulation of NOXA by c-MYC in response to proteasome inhibition. *Proc Natl Acad Sci USA* 104, 19488-19493
- Nikrad, M., Johnson, T., Puthalalath, H., Coultas, L., Adams, J., and Kraft, A.S. (2005). The proteasome inhibitor bortezomib sensitizes cells to killing by death receptor ligand TRAIL via BH3-only proteins Bik and Bim. *Mol Cancer Ther* 4, 443-449
- Nomura, M., Shimizu, S., Sugiyama, T., Narita, M., Ito, T., Matsuda, H., and Tsujimoto, Y. (2003). 14-3-3 Interacts directly with and negatively regulates pro-apoptotic Bax. *J Biol Chem* 278, 2058-2065
- O'Neill, J.W., Manion, M.K., Maguire, B., and Hockenbery, D.M. (2006). BCL-XL dimerization by three-dimensional domain swapping. *J Mol Biol* 356, 367-381
- Oberstein, A., Jeffrey, P.D., and Shi, Y. (2007). Crystal structure of the Bcl-XL-Bcl-1 peptide complex: Bcl-1 is a novel BH3-only protein. *J Biol Chem* 282, 13123-13132
- Oda, E., Ohki, R., Murasawa, H., Nemoto, J., Shibue, T., Yamashita, T., Tokino, T., Taniguchi, T., and Tanaka, N. (2000). Noxa, a BH3-only member of the Bcl-2 family and candidate mediator of p53-induced apoptosis. *Science* 288, 1053-1058
- Ohtsuka, T., Ryu, H., Minamishima, Y.A., Macip, S., Sagara, J., Nakayama, K.I., Aaronson, S.A., and Lee, S.W. (2004). ASC is a Bax adaptor and regulates the p53-Bax mitochondrial apoptosis pathway. *Nat Cell Biol* 6, 121-128
- Orlofsky, A., Weiss, L.M., Kawachi, N., and Prystowsky, M.B. (2002). Deficiency in the anti-apoptotic protein A1-a results in a diminished acute inflammatory response. *J Immunol* 168, 1840-1846
- Petros, A.M., Medek, A., Nettesheim, D.G., Kim, D.H., Yoon, H.S., Swift, K., Matayoshi, E.D., Oltersdorf, T., and Fesik, S.W. (2001). Solution structure of the antiapoptotic protein bcl-2. *Proc Natl Acad Sci U S A* 98, 3012-3017
- Petros, A.M., Nettesheim, D.G., Wang, Y., Olejniczak, E.T., Meadows, R.P., Mack, J., Swift, K., Matayoshi, E.D., Zhang, H., Thompson, C.B., and Fesik, S.W. (2000). Rationale for Bcl-xL/Bad peptide complex formation from structure, mutagenesis, and biophysical studies. *Protein Sci* 9, 2528-2534
- Ploner, C., Rainer, J., Niederegger, H., Eduardoff, M., Villunger, A., Geley, S., and Kofler, R. (2008). The BCL2 rheostat in glucocorticoid-induced apoptosis of acute lymphoblastic leukemia. *Leukemia* 22, 370-377

- Print, C.G., Loveland, K.L., Gibson, L., Meehan, T., Stylianou, A., Wreford, N., de Kretser, D., Metcalf, D., Kontgen, F., Adams, J.M., and Cory, S. (1998). Apoptosis regulator bcl-w is essential for spermatogenesis but appears otherwise redundant. *Proc Natl Acad Sci U S A* *95*, 12424-12431
- Putchu, G.V., Le, S., Frank, S., Besirli, C.G., Clark, K., Chu, B., Alix, S., Youle, R.J., LaMarche, A., Maroney, A.C., and Johnson, E.M. (2003). JNK-mediated BIM phosphorylation potentiates BAX-dependent apoptosis. *Neuron* *38*, 899-914
- Puthalakath, H., Huang, D.C., O'Reilly, L.A., King, S.M., and Strasser, A. (1999). The proapoptotic activity of the Bcl-2 family member Bim is regulated by interaction with the dynein motor complex. *Molecular Cell* *3*, 287-296
- Puthalakath, H., O'Reilly, L.A., Gunn, P., Lee, L., Kelly, P.N., Huntington, N.D., Hughes, P.D., Michalak, E.M., McKimm-Breschkin, J., Motoyama, N., *et al.* (2007). ER stress triggers apoptosis by activating BH3-only protein Bim. *Cell* *129*, 1337-1349
- Puthalakath, H., Villunger, A., O'Reilly, L.A., Beaumont, J.G., Coultas, L., Cheney, R.E., Huang, D.C., and Strasser, A. (2001). Bmf: a proapoptotic BH3-only protein regulated by interaction with the myosin V actin motor complex, activated by anoikis. *Science* *293*, 1829-1832
- Ramjaun, A.R., Tomlinson, S., Eddaoudi, A., and Downward, J. (2007). Upregulation of two BH3-only proteins, Bmf and Bim, during TGF beta-induced apoptosis. *Oncogene* *26*, 970-981
- Ranger, A.M., Zha, J., Harada, H., Datta, S.R., Danial, N.N., Gilmore, A.P., Kutok, J.L., Le Beau, M.M., Greenberg, M.E., and Korsmeyer, S.J. (2003). Bad-deficient mice develop diffuse large B cell lymphoma. *Proc Natl Acad Sci U S A* *100*, 9324-9329
- Real, P.J., Sanz, C., Gutierrez, O., Pipaon, C., Zubiaga, A.M., and Fernandez-Luna, J.L. (2006). Transcriptional activation of the proapoptotic bik gene by E2F proteins in cancer cells. *FEBS Lett* *580*, 5905-5909
- Reiners, J.J., Caruso, J.A., Mathieu, P., Chelladurai, B., Yin, X.-M., and Kessel, D. (2002). Release of cytochrome c and activation of pro-caspase-9 following lysosomal photodamage involves Bid cleavage. *Cell Death Differ* *9*, 934-944
- Rinkenberger, J.L., Horning, S., Klocke, B., Roth, K., and Korsmeyer, S.J. (2000). Mcl-1 deficiency results in peri-implantation embryonic lethality. *Genes Dev* *14*, 23-27
- Rocco, J.W., Leong, C.-O., Kuperwasser, N., DeYoung, M.P., and Ellisen, L.W. (2006). p63 mediates survival in squamous cell carcinoma by suppression of p73-dependent apoptosis. *Cancer Cell* *9*, 45-56
- Rodolfo, C., Mormone, E., Matarrese, P., Ciccocanti, F., Farrace, M.G., Garofano, E., Piredda, L., Fimia, G.M., Malorni, W., and Piacentini, M. (2004). Tissue transglutaminase is a multifunctional BH3-only protein. *J Biol Chem* *279*, 54783-54792
- Sanz, C., Mellstrom, B., Link, W.A., Naranjo, J.R., and Fernandez-Luna, J.L. (2001). Interleukin 3-dependent activation of DREAM is involved in transcriptional silencing of the apoptotic Hrk gene in hematopoietic progenitor cells. *EMBO J* *20*, 2286-2292
- Sattler, M., Liang, H., Nettlesheim, D., Meadows, R.P., Harlan, J.E., Eberstadt, M., Yoon, H.S., Shuker, S.B., Chang, B.S., Minn, A.J., *et al.* (1997). Structure of Bcl-xL-Bak peptide complex: recognition between regulators of apoptosis. *Science* *275*, 983-986

- Schürmann, A., Mooney, A.F., Sanders, L.C., Sells, M.A., Wang, H.G., Reed, J.C., and Bokoch, G.M. (2000). p21-activated kinase 1 phosphorylates the death agonist bad and protects cells from apoptosis. *Mol Cell Biol* *20*, 453-461
- Schweers, R.L., Zhang, J., Randall, M.S., Loyd, M.R., Li, W., Dorsey, F.C., Kundu, M., Opferman, J.T., Cleveland, J.L., Miller, J.L., and Ney, P.A. (2007). NIX is required for programmed mitochondrial clearance during reticulocyte maturation. *Proc Natl Acad Sci U S A* *104*, 19500-19505
- Schwickart, M., Huang, X., Lill, J.R., Liu, J., Ferrando, R., French, D.M., Maecker, H., O'Rourke, K., Bazan, R., Eastham-Anderson, J., *et al.* (2010). Deubiquitinase USP9X stabilizes MCL1 and promotes tumour cell survival. *Nature* *463*, 103-107
- Shen, Z., Esnault, S., Schinzel, A., Borner, C., and Malter, J. (2009). The peptidyl-prolyl isomerase Pin1 facilitates cytokine-induced survival of eosinophils by suppressing Bax activation. *Nat Immunol* *10*, 257-265
- Smits, C., Czabotar, P.E., Hinds, M.G., and Day, C.L. (2008). Structural plasticity underpins promiscuous binding of the prosurvival protein A1. *Structure* *16*, 818-829
- Sowter, H.M., Ratcliffe, P.J., Watson, P., Greenberg, A.H., and Harris, A.L. (2001). HIF-1-dependent regulation of hypoxic induction of the cell death factors BNIP3 and NIX in human tumors. *Cancer Res* *61*, 6669-6673
- Spender, L.C., O'Brien, D.I., Simpson, D., Dutt, D., Gregory, C.D., Allday, M.J., Clark, L.J., and Inman, G.J. (2009). TGF-beta induces apoptosis in human B cells by transcriptional regulation of BIK and BCL-XL. *Cell Death Differ* *16*, 593-602
- Stoka, V., Turk, B., Schendel, S.L., Kim, T.H., Cirman, T., Snipas, S.J., Ellerby, L.M., Bredesen, D., Freeze, H., Abrahamson, M., *et al.* (2001). Lysosomal protease pathways to apoptosis. Cleavage of bid, not pro-caspases, is the most likely route. *J Biol Chem* *276*, 3149-3157
- Sutton, V.R., Davis, J.E., Cancilla, M., Johnstone, R.W., Ruefli, A.A., Sedelies, K., Browne, K.A., and Trapani, J.A. (2000). Initiation of apoptosis by granzyme B requires direct cleavage of bid, but not direct granzyme B-mediated caspase activation. *J Exp Med* *192*, 1403-1414
- Suzuki, M., Youle, R.J., and Tjandra, N. (2000). Structure of Bax: coregulation of dimer formation and intracellular localization. *Cell* *103*, 645-654
- Tait, S.W., de Vries, E., Maas, C., Keller, A.M., D'Santos, C.S., and Borst, J. (2007). Apoptosis induction by Bid requires unconventional ubiquitination and degradation of its N-terminal fragment. *J Cell Biol* *179*, 1453-1466
- Tan, K.O., Fu, N.Y., Sukumaran, S.K., Chan, S.L., Kang, J.H., Poon, K.L., Chen, B.S., and Yu, V.C. (2005). MAP-1 is a mitochondrial effector of Bax. *Proc Natl Acad Sci U S A* *102*, 14623-14628
- Tan, K.O., Tan, K.M., Chan, S.L., Yee, K.S., Bevort, M., Ang, K.C., and Yu, V.C. (2001). MAP-1, a novel proapoptotic protein containing a BH3-like motif that associates with Bax through its Bcl-2 homology domains. *J Biol Chem* *276*, 2802-2807
- Tan, Y., Ruan, H., Demeter, M.R., and Comb, M.J. (1999). p90(RSK) blocks bad-mediated cell death via a protein kinase C-dependent pathway. *J Biol Chem* *274*, 34859-34867
- Toyota, H., Yanase, N., Yoshimoto, T., Moriyama, M., Sudo, T., and Mizuguchi, J. (2003). Calpain-induced Bax-cleavage product is a more potent inducer of apoptotic cell death than wild-type Bax. *Cancer Lett* *189*, 221-230



- Veis, D.J., Sorenson, C.M., Shutter, J.R., and Korsmeyer, S.J. (1993). Bcl-2-deficient mice demonstrate fulminant lymphoid apoptosis, polycystic kidneys, and hypopigmented hair. *Cell* 75, 229-240
- Verma, S., Zhao, L.J., and Chinnadurai, G. (2001). Phosphorylation of the pro-apoptotic protein BIK: mapping of phosphorylation sites and effect on apoptosis. *J Biol Chem* 276, 4671-4676
- Villunger, A., Michalak, E.M., Coultas, L., Mullauer, F., Bock, G., Ausserlechner, M.J., Adams, J.M., and Strasser, A. (2003). p53- and drug-induced apoptotic responses mediated by BH3-only proteins puma and noxa. *Science* 302, 1036-1038
- Wang, H., Takemoto, C., Akasaka, R., Uchikubo-Kamo, T., Kishishita, S., Murayama, K., Terada, T., Chen, L., Liu, Z.J., Wang, B.C., *et al.* (2009). Novel dimerization mode of the human Bcl-2 family protein Bak, a mitochondrial apoptosis regulator. *J Struct Biol* 166, 32-37
- Wang, H.G., Pathan, N., Ethell, I.M., Krajewski, S., Yamaguchi, Y., Shibasaki, F., McKeon, F., Bobo, T., Franke, T.F., and Reed, J.C. (1999). Ca<sup>2+</sup>-induced apoptosis through calcineurin dephosphorylation of BAD. *Science* 284, 339-343
- Wang, Y., Guan, X., Fok, K.L., Li, S., Zhang, X., Miao, S., Zong, S., Koide, S.S., Chan, H.C., and Wang, L. (2008). A novel member of the Rhomboid family, RHBDD1, regulates BIK-mediated apoptosis. *Cell Mol Life Sci* 65, 3822-3829
- Warr, M.R., Acoca, S., Liu, Z., Germain, M., Watson, M., Blanchette, M., Wing, S.S., and Shore, G.C. (2005). BH3-ligand regulates access of MCL-1 to its E3 ligase. *FEBS Lett* 579, 5603-5608
- Wei, M.C., Zong, W.X., Cheng, E.H., Lindsten, T., Panoutsakopoulou, V., Ross, A.J., Roth, K.A., MacGregor, G.R., Thompson, C.B., and Korsmeyer, S.J. (2001). Proapoptotic BAX and BAK: a requisite gateway to mitochondrial dysfunction and death. *Science* 292, 727-730
- Wei, Y., Pattingre, S., Sinha, S., Bassik, M., and Levine, B. (2008). JNK1-mediated phosphorylation of Bcl-2 regulates starvation-induced autophagy. *Molecular Cell* 30, 678-688
- Welch, C., Santra, M.K., El-Assaad, W., Zhu, X., Huber, W.E., Keys, R.A., Teodoro, J.G., and Green, M.R. (2009). Identification of a protein, G0S2, that lacks Bcl-2 homology domains and interacts with and antagonizes Bcl-2. *Cancer Res* 69, 6782-6789
- Willis, S.N., Chen, L., Dewson, G., Wei, A., Naik, E., Fletcher, J.I., Adams, J.M., and Huang, D.C. (2005). Proapoptotic Bak is sequestered by Mcl-1 and Bcl-xL, but not Bcl-2, until displaced by BH3-only proteins. *Genes Dev* 19, 1294-1305
- Willis, S.N., Fletcher, J.I., Kaufmann, T., van Delft, M.F., Chen, L., Czabotar, P.E., Ierino, H., Lee, E.F., Fairlie, W.D., Bouillet, P., *et al.* (2007). Apoptosis initiated when BH3 ligands engage multiple Bcl-2 homologs, not Bax or Bak. *Science* 315, 856-859
- Wu, W.-S., Heinrichs, S., Xu, D., Garrison, S.P., Zambetti, G.P., Adams, J.M., and Look, A.T. (2005). Slug antagonizes p53-mediated apoptosis of hematopoietic progenitors by repressing puma. *Cell* 123, 641-653
- Xiao, C., Srinivasan, L., Calado, D.P., Patterson, H.C., Zhang, B., Wang, J., Henderson, J.M., Kutok, J.L., and Rajewsky, K. (2008). Lymphoproliferative disease and autoimmunity in mice with increased miR-17-92 expression in lymphocytes. *Nat Immunol* 9, 405-414
- Xiao, D., Choi, S., Johnson, D.E., Vogel, V.G., Johnson, C.S., Trump, D.L., Lee, Y.J., and Singh, S.V. (2004). Diallyl trisulfide-induced apoptosis in human prostate cancer cells involves c-Jun N-terminal

kinase and extracellular-signal regulated kinase-mediated phosphorylation of Bcl-2. *Oncogene* 23, 5594-5606

Xin, M., and Deng, X. (2005). Nicotine inactivation of the proapoptotic function of Bax through phosphorylation. *J Biol Chem* 280, 10781-10789

Xin, M., and Deng, X. (2006). Protein phosphatase 2A enhances the proapoptotic function of Bax through dephosphorylation. *J Biol Chem* 281, 18859-18867

Xin, M., Gao, F., May, W.S., Flagg, T., and Deng, X. (2007). Protein kinase Czeta abrogates the proapoptotic function of Bax through phosphorylation. *J Biol Chem* 282, 21268-21277

Yamamoto, K., Ichijo, H., and Korsmeyer, S.J. (1999). BCL-2 is phosphorylated and inactivated by an ASK1/Jun N-terminal protein kinase pathway normally activated at G(2)/M. *Mol Cell Biol* 19, 8469-8478

Yamashita, M., Kuwahara, M., Suzuki, A., Hirahara, K., Shinnaksu, R., Hosokawa, H., Hasegawa, A., Motohashi, S., Iwama, A., and Nakayama, T. (2008). Bmi1 regulates memory CD4 T cell survival via repression of the Noxa gene. *J Exp Med* 205, 1109-1120

Yan, B., Zemskova, M., Holder, S., Chin, V., Kraft, A., Koskinen, P.J., and Lilly, M. (2003). The PIM-2 kinase phosphorylates BAD on serine 112 and reverses BAD-induced cell death. *J Biol Chem* 278, 45358-45367

Yin, X.M., Wang, K., Gross, A., Zhao, Y., Zinkel, S., Klocke, B., Roth, K.A., and Korsmeyer, S.J. (1999). Bid-deficient mice are resistant to Fas-induced hepatocellular apoptosis. *Nature* 400, 886-891

You, H., Pellegrini, M., Tsuchihara, K., Yamamoto, K., Hacker, G., Erlacher, M., Villunger, A., and Mak, T.W. (2006). FOXO3a-dependent regulation of Puma in response to cytokine/growth factor withdrawal. *J Exp Med* 203, 1657-1663

Yousefi, S., Perozzo, R., Schmid, I., Ziemiecki, A., Schaffner, T., Scapozza, L., Brunner, T., and Simon, H.U. (2006). Calpain-mediated cleavage of Atg5 switches autophagy to apoptosis. *Nat Cell Biol* 8, 1124-1132

Yu, J., Zhang, L., Hwang, P.M., Kinzler, K.W., and Vogelstein, B. (2001). PUMA induces the rapid apoptosis of colorectal cancer cells. *Molecular Cell* 7, 673-682

Zha, J., Harada, H., Yang, E., Jockel, J., and Korsmeyer, S.J. (1996). Serine phosphorylation of death agonist BAD in response to survival factor results in binding to 14-3-3 not BCL-X(L). *Cell* 87, 619-628

Zha, J., Weiler, S., Oh, K.J., Wei, M.C., and Korsmeyer, S.J. (2000). Posttranslational N-myristoylation of BID as a molecular switch for targeting mitochondria and apoptosis. *Science* 290, 1761-1765

Zhai, D., Luciano, F., Zhu, X., Guo, B., Satterthwait, A.C., and Reed, J.C. (2005). Humanin binds and nullifies Bid activity by blocking its activation of Bax and Bak. *J Biol Chem* 280, 15815-15824

Zhao, R., Oxley, D., Smith, T.S., Follows, G.A., Green, A.R., and Alexander, D.R. (2007). DNA damage-induced Bcl-xL deamidation is mediated by NHE-1 antiport regulated intracellular pH. *PLoS Biol* 5, e1

Zhong, Q., Gao, W., Du, F., and Wang, X. (2005). Mule/ARF-BP1, a BH3-only E3 ubiquitin ligase, catalyzes the polyubiquitination of Mcl-1 and regulates apoptosis. *Cell* 121, 1085-1095

Zhu, H., Guo, W., Zhang, L., Wu, S., Teraishi, F., Davis, J.J., Dong, F., and Fang, B. (2005). Proteasome inhibitors-mediated TRAIL resensitization and Bik accumulation. *Cancer Biol Ther* 4, 781-786

Zinkel, S.S., Hurov, K.E., Ong, C., Abtahi, F.M., Gross, A., and Korsmeyer, S.J. (2005). A role for proapoptotic BID in the DNA-damage response. *Cell* 122, 579-591
